# Supplementary material for: In situ construction of superhydrophilic crystalline Ni3S2@amorphous VOx heterostructure nanorod arrays for the hydrogen evolution reaction with industry-compatible current density
Source: Royal Society of Chemistry journal article supplement (doi:10.1039/d2dt00157h), 2022-01-01
Supplement: d2dt00157h1.pdf [file d2dt00157h1.pdf]

Supporting Information (SI):

# ***In-situ* construction of superhydrophilic crystalline $\text{Ni}_3\text{S}_2$ @amorphous $\text{VO}_x$ heterostructure nanorod arrays for hydrogen evolution reaction with industry-compatible current density**

*Qianqian Liu<sup>a,b</sup>, Jianfeng Huang<sup>a,\*</sup>, Kehan Liu<sup>b</sup>, Huiling Du<sup>b</sup>, Le Kang<sup>b</sup>, Dan Yang<sup>a</sup>,*

*Mengfan Niu<sup>a</sup>, Guodong Li<sup>c</sup>, Liyun Cao<sup>a</sup> and Liangliang Feng<sup>a,\*</sup>*

*<sup>a</sup> School of Material Science and Engineering, Key Laboratory of Auxiliary Chemistry and Technology for Chemical Industry, Ministry of Education, Shaanxi University of Science and Technology, Xi'an 710021, China.*

*<sup>b</sup> College of Materials Science and Engineering, Xi'an University of Science and Technology, Xi'an 710054, China*

*<sup>c</sup> State Key Laboratory of Inorganic Synthesis and Preparative Chemistry, College of Chemistry, Jilin University, Changchun 130012, China.*

*\*Corresponding author.*

E-mail: [huangjf@sust.edu.cn](mailto:huangjf@sust.edu.cn); [fengl@l@sust.edu.cn](mailto:fengl@l@sust.edu.cn)

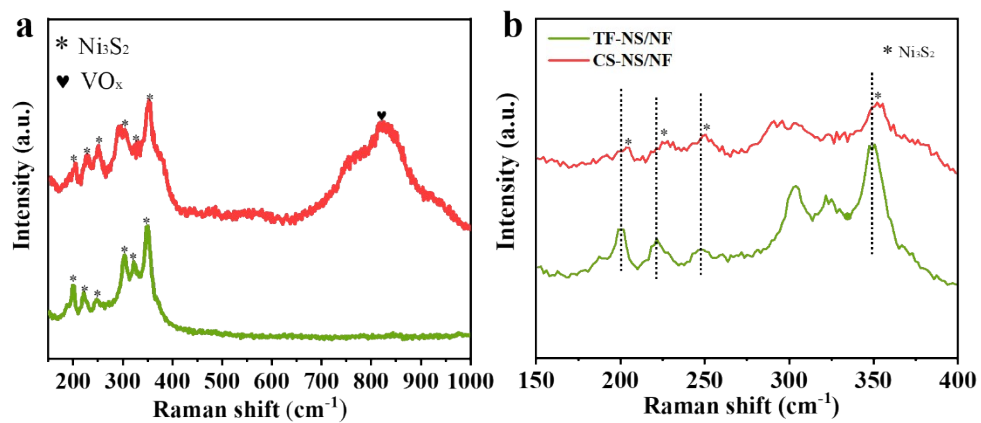

**Fig. S1** (a) Raman spectra and (b) local magnification of CS-NC/NF and TF-NS/NF.

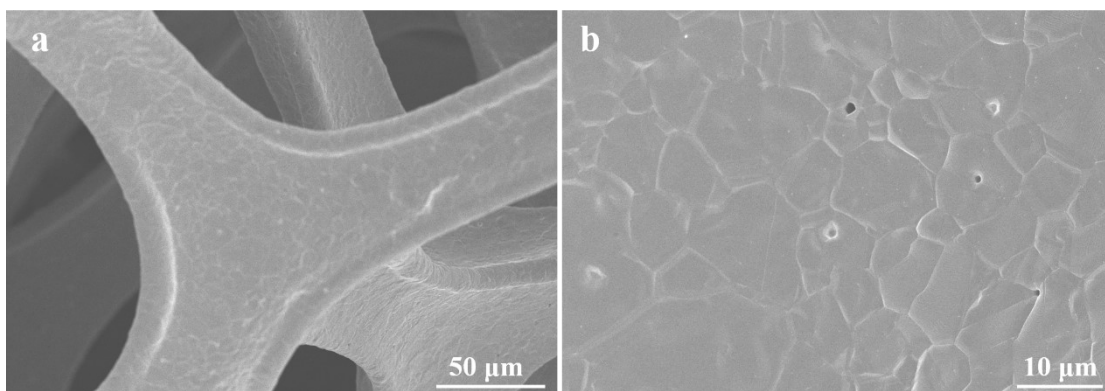

**Fig. S2** SEM images of bare Ni foam (NF).

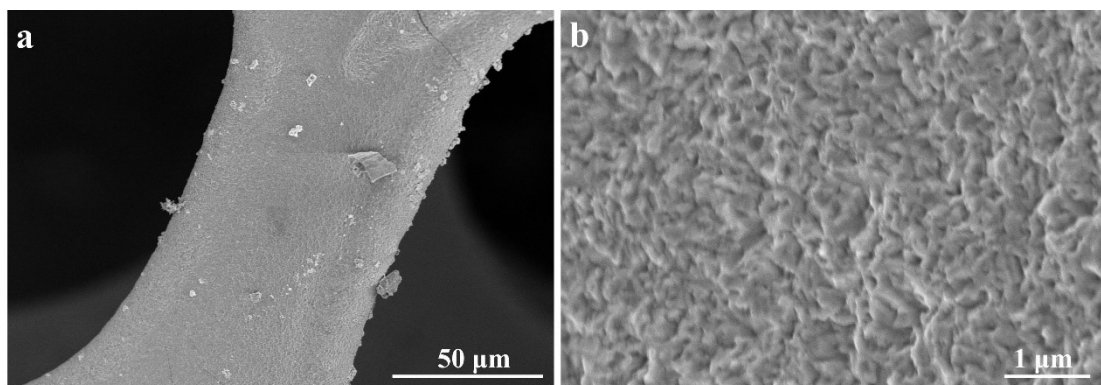

**Fig. S3 (a, b)** SEM images of TF-NS/NF.

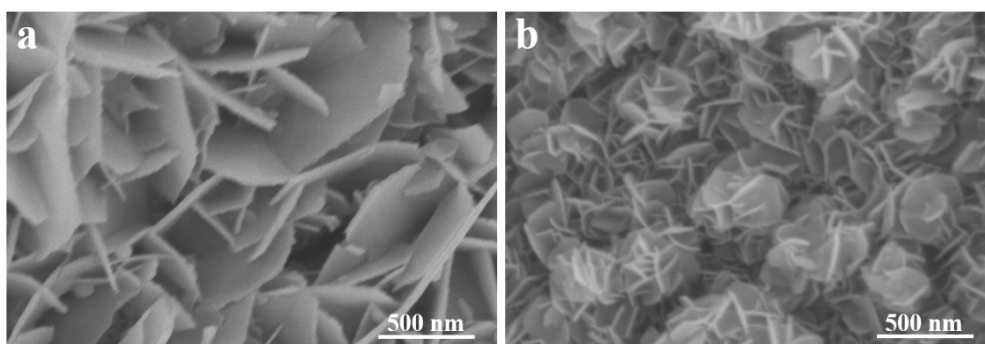

**Fig. S4** SEM images of the precursor of (a)CS-NS/NF and (b)TF-NS/NF.

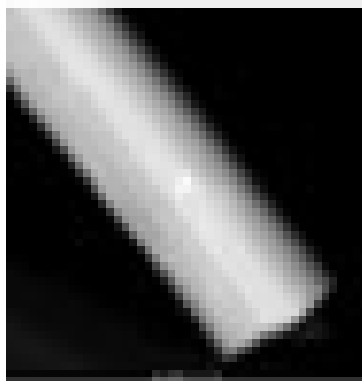

**Fig. S5** The STEM image of the CS-NS/NF.

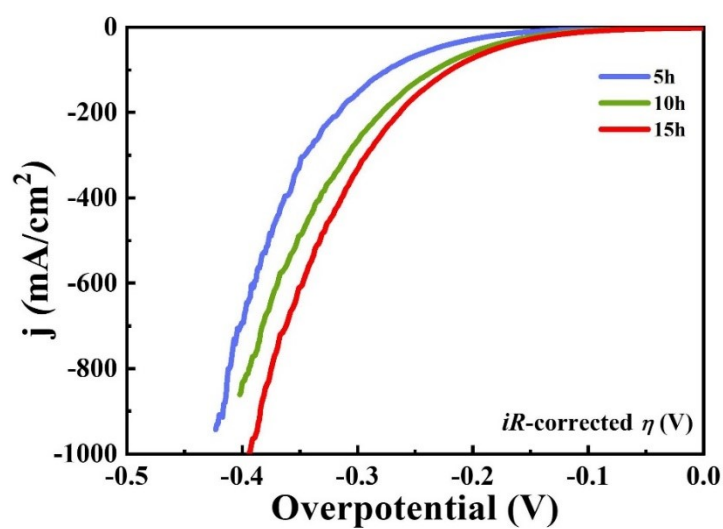

**Fig. S6** HER LSV curves obtained from control experiments under the different reaction time.

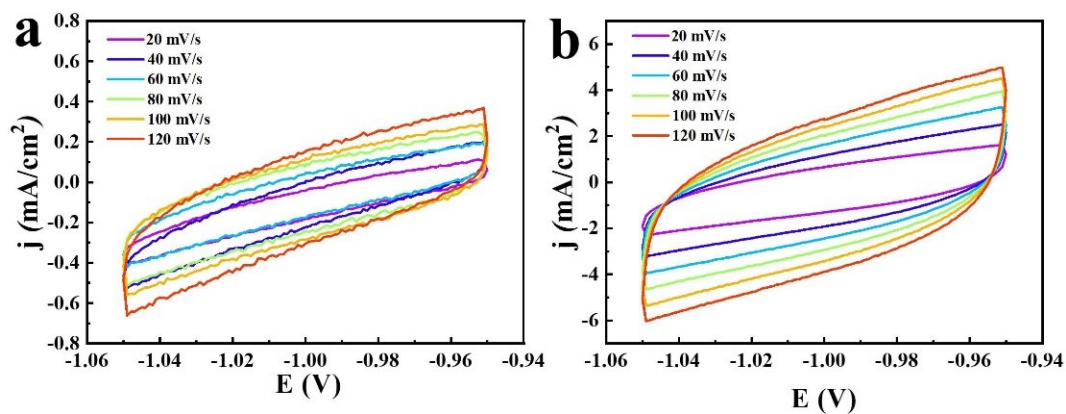

**Fig. S7** CV curves of (a) TF-NS/NF and (b) CS-NS/NF at different scan rates.

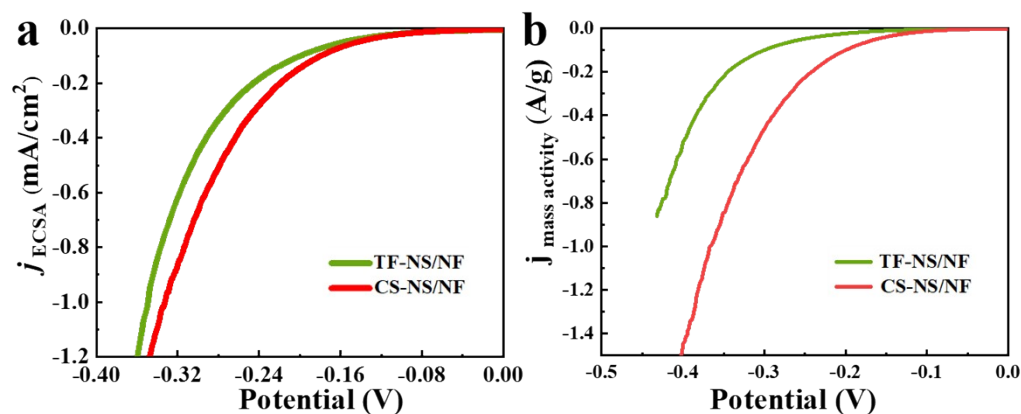

**Fig. S8** (a)HER ECSA-normalized LSV curves of CS-NS/NF and TF-NS/NF. (b) The mass normalized current density of two catalysts.

The current densities measured have been normalized by the electrochemically active surface area (ECSA) value ( $j_{ECSA} = \frac{j}{ECSA}$ ). As shown in Fig.S7, the CS-NS/NF still exhibits the better catalytic activity, implying the improved intrinsic HER activity [1].

The ECSA of a catalyst sample is calculated from the double-layer capacitance according to the following equation:

$$ECSA = \frac{C_{dl}}{C_s}$$

$C_s$  presents the specific capacitance, the value of which is 0.040 mF cm<sup>-2</sup> in 1 M KOH based on the previous reported literature [2].

[1] Y. Niu, W. Li, X. Wu, et al., J.Mater. Chem. A 7 (2019) 10534-10542.

[2] C. L. McCrory, S. Jung, J. Peters, et al., J. Am. Chem. Soc. 135 (2013) 16977-16987.

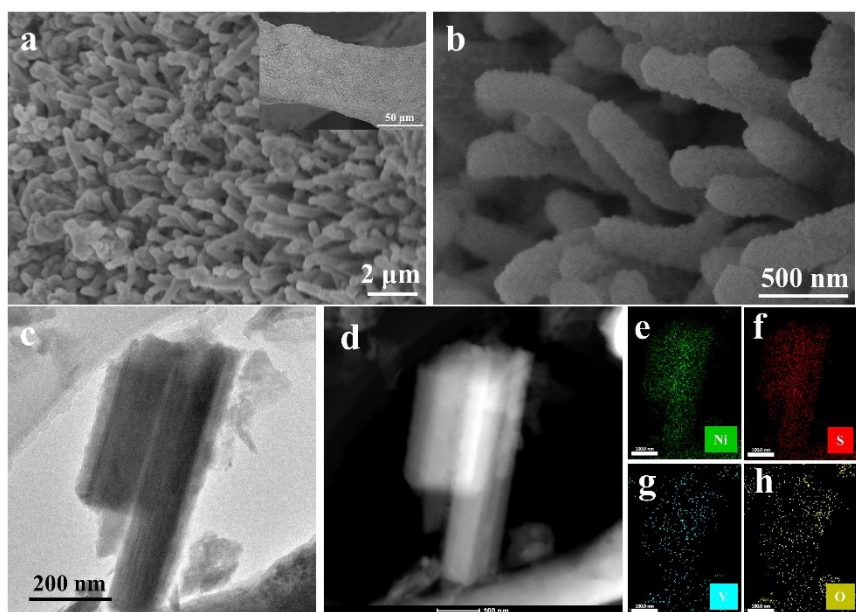

**Fig. S9** (a, b) SEM images; (c) TEM image; (d) The STEM image and (e-h) EDS elemental mapping images Ni, V, O and S of the CS-NS/NF electrode after the HER stability test.

**Table S1.** Comparison of the HER performance at large current density of CS-NS/NF with some  $\text{Ni}_3\text{S}_2$ -based electrocatalysts reported recently.

| Catalyst | Electrolyte | Overpotential (mV)             | Stability test (h) | Reference        |
|----------|-------------|--------------------------------|--------------------|------------------|
| CS-NS/NF | 1 M KOH     | <b>99@10 mA/cm<sup>2</sup></b> | <b>68</b>          | <b>This work</b> |

|                                                                      |         |                                                                                                           |    |                                                 |
|----------------------------------------------------------------------|---------|-----------------------------------------------------------------------------------------------------------|----|-------------------------------------------------|
|                                                                      |         | <b>221@100 mA/cm<sup>2</sup></b><br><b>335@500 mA/cm<sup>2</sup></b><br><b>394@1000 mA/cm<sup>2</sup></b> |    |                                                 |
| Fe-Mo-S/Ni <sub>3</sub> S <sub>2</sub> @NF                           | 1 M KOH | 141@10 mA/cm <sup>2</sup><br>266@100 mA/cm <sup>2</sup><br>384@500 mA/cm <sup>2</sup>                     | 24 | Chem. Eng. J. 2021,<br>404, 126483              |
| Ni <sub>3</sub> S <sub>2</sub> @NGCLs/NF                             | 1 M KOH | 134@10 mA/cm <sup>2</sup><br>225@100 mA/cm <sup>2</sup>                                                   | 40 | Chem. Eng. J. 2020,<br>401, 126045              |
| NiWO <sub>4</sub> /Ni <sub>3</sub> S <sub>2</sub>                    | 1 M KOH | 136@10 mA/cm <sup>2</sup><br>274@100 mA/cm <sup>2</sup>                                                   | 75 | Appl. Catal. B<br>Environ. 2020, 274,<br>119120 |
| CoNi <sub>2</sub> S <sub>4</sub> /Ni <sub>3</sub> S <sub>2</sub> @NF | 1 M KOH | 171@10 mA/cm <sup>2</sup><br>350@100 mA/cm <sup>2</sup><br>500@200 mA/cm <sup>2</sup>                     | 20 | J. Alloys Compd.<br>2020, 844,156252            |
| CoS <sub>x</sub> -Ni <sub>3</sub> S <sub>2</sub> /NF                 | 1 M KOH | 90@10 mA/cm <sup>2</sup><br>275@100 mA/cm <sup>2</sup><br>318@300 mA/cm <sup>2</sup>                      | 18 | Appl. Catal., B 2020,<br>269, 118780.           |
| Co <sub>9</sub> S <sub>8</sub> -Ni <sub>3</sub> S <sub>2</sub> /NF   | 1 M KOH | 210@10 mA/cm <sup>2</sup><br>450@100 mA/cm <sup>2</sup>                                                   | 24 | Chem. Eur. J. 2020,<br>26, 7900-7911            |
| NS-horn/NF                                                           | 1 M KOH | 177@10 mA/cm <sup>2</sup><br>350@100 mA cm <sup>-2</sup>                                                  | 20 | Appl. Catal. B<br>Environ. 2019,<br>257, 117911 |
| Fe-Ni <sub>3</sub> S <sub>2</sub> /NF                                | 1 M KOH | 47@10 mA/cm <sup>2</sup><br>232@100 mA cm <sup>-2</sup>                                                   | 20 | ACS Catal. 2018, 8,<br>6, 5431–5441             |
| Co-<br>Ni <sub>3</sub> S <sub>2</sub> @CNTs/GNF                      | 1 M KOH | 155@10 mA/cm <sup>2</sup><br>350@100 mA/cm <sup>2</sup>                                                   | 20 | J. Mater. Chem. A,<br>2018, 6, 10490-10496      |
| Sn-Ni <sub>3</sub> S <sub>2</sub> /NF                                | 1 M KOH | 137@10 mA/cm <sup>2</sup><br>320@100 mA/cm <sup>2</sup>                                                   | 20 | Chemelectrochem<br>2017, 4, 594-600             |

### Turnover frequency (TOF) calculations

Because it is hard to identify the number of electrochemical active sites for metal substrate supported electrocatalysts, in our calculations, all metal atoms are assumed to be catalytically active. However, because a fraction of metal sites might not contribute

to the catalytic reaction, the calculated TOF represents a lower limit. It means that the true TOF is higher.

The values of turnover frequency (TOF) were calculated according to the following equation:

$$\text{TOF} = |j| \times S / 2F \times n \quad (1)$$

where,  $j$  (mA/cm<sup>2</sup>) is the measured current density at the potentials;  $S$  represents the surface area of the working electrode (CS-NS on NF, cm<sup>2</sup>); the number 2 stands for a four electron transfer per mole of H<sub>2</sub>;  $F$  is Faraday's constant (96 485.3 C/mol), and  $n$  represents the moles of the metal atom on the electrode which can be calculated by using the mass and the molecular weight of the coated catalysts. The corresponding descriptions have been added into the revised manuscript and are expected to meet your requirements.

**Table S2.** TOF calculation results of electrocatalysts.

| <b>Samples</b>  | <b>amount of<br/>loading<br/>(mg/cm<sup>2</sup>)</b> | <b>surface area of<br/>the working<br/>electrode (cm<sup>2</sup>)</b> | <b><math>j@ \eta=200</math> mV<br/>(mA/cm<sup>2</sup>)</b> | <b>TOF<br/>(h<sup>-1</sup>)</b> |
|-----------------|------------------------------------------------------|-----------------------------------------------------------------------|------------------------------------------------------------|---------------------------------|
| <b>CS-NS/NF</b> | 0.71                                                 | 0.25                                                                  | 80                                                         | <b>36.942</b>                   |
| <b>TF-NS/NF</b> | 0.60                                                 | 0.25                                                                  | 25                                                         | <b>7.773</b>                    |
